# Supplementary material for: Native dynamics and allosteric responses in PTP1B probed by high‐resolution HDX‐MS
Source: PubMed Central journal article supplement (PMC11129624; doi:10.1002/pro.5024), 2024-05-27
Supplement: PRO-33-e5024-s001.pdf [file PRO-33-e5024-s001.pdf]

# Supplemental Information

Native dynamics and allosteric responses in PTP1B probed by high-resolution HDX-MS

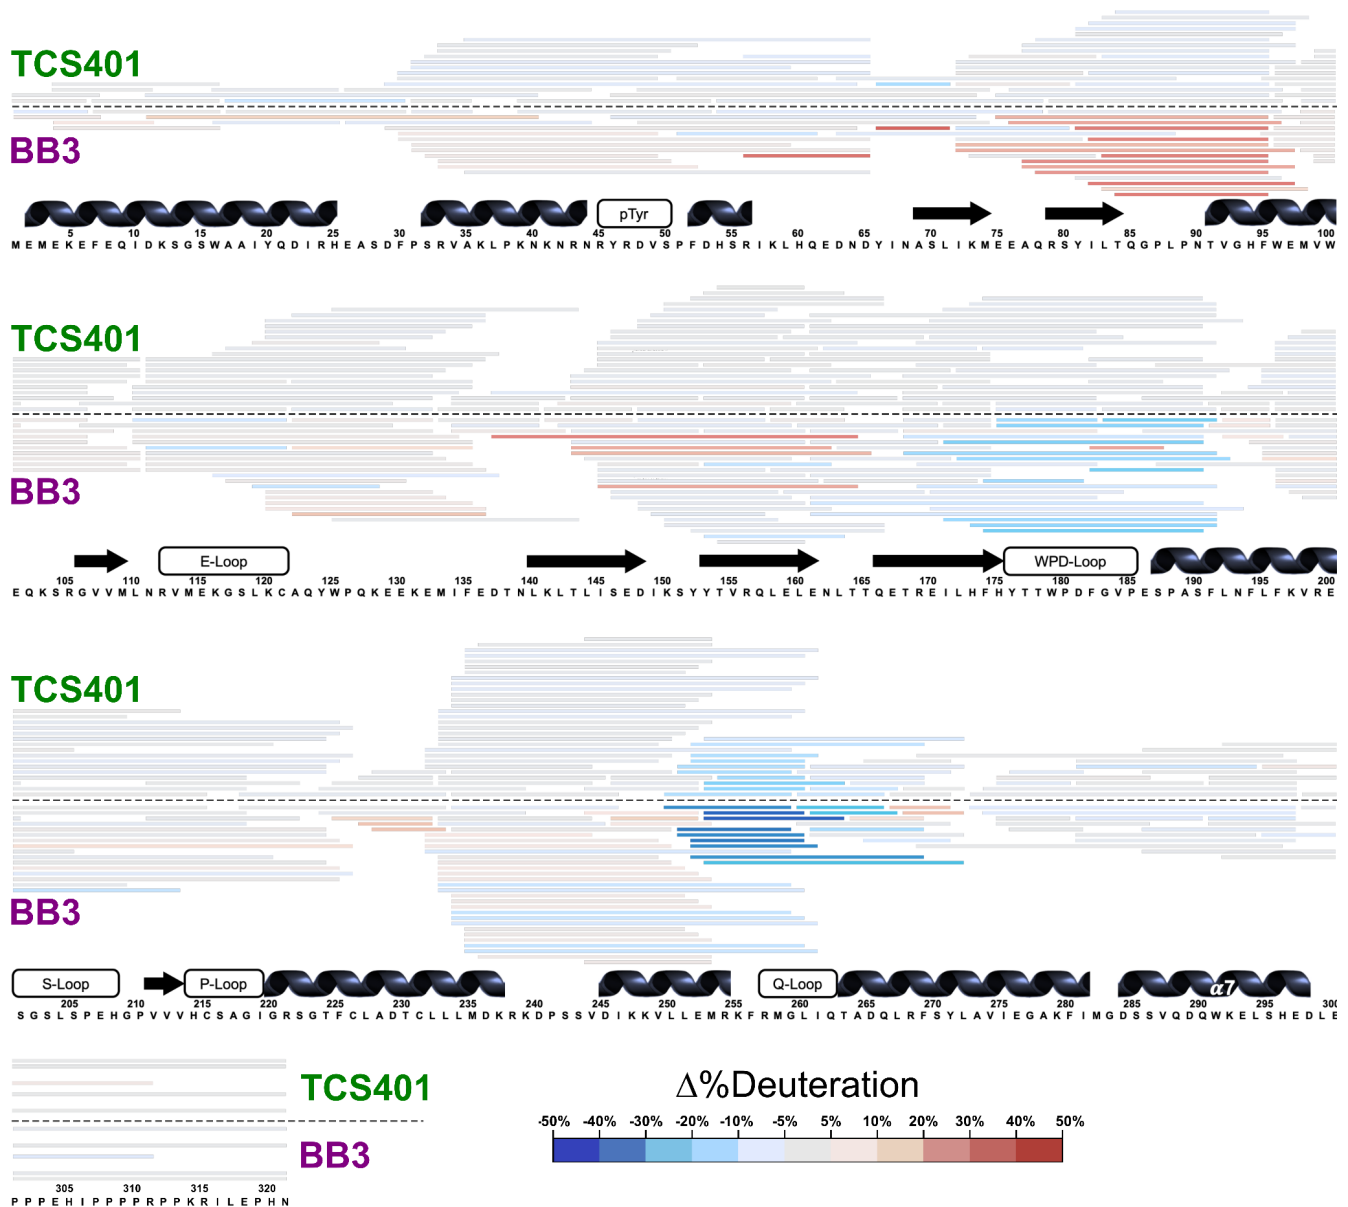

**Figure S1: Difference HDX map for TCS401 minus apo PTP1B at 30 seconds.**

Peptide maps for the TCS401 and BB3 conditions, with peptides colored based on the difference in HDX rate between liganded minus apo conditions at 30 seconds of labeling time.

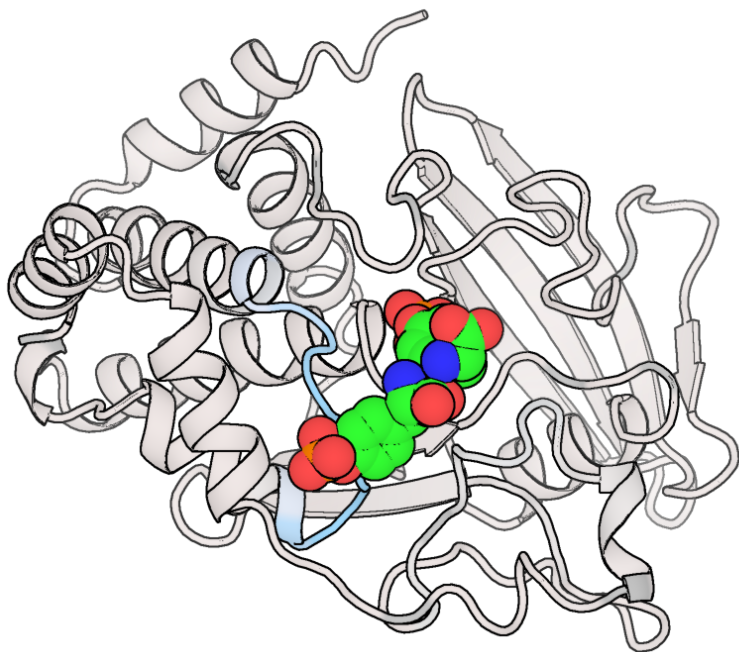

**Figure S2: Structural view of TCS401 HDX differences in the context of two pTyr sites.**

Same as main **Fig. 5A** (30 seconds labeling) but with TCS401 omitted and the two pTyr residues from PDB ID 1PTY overlaid (green).

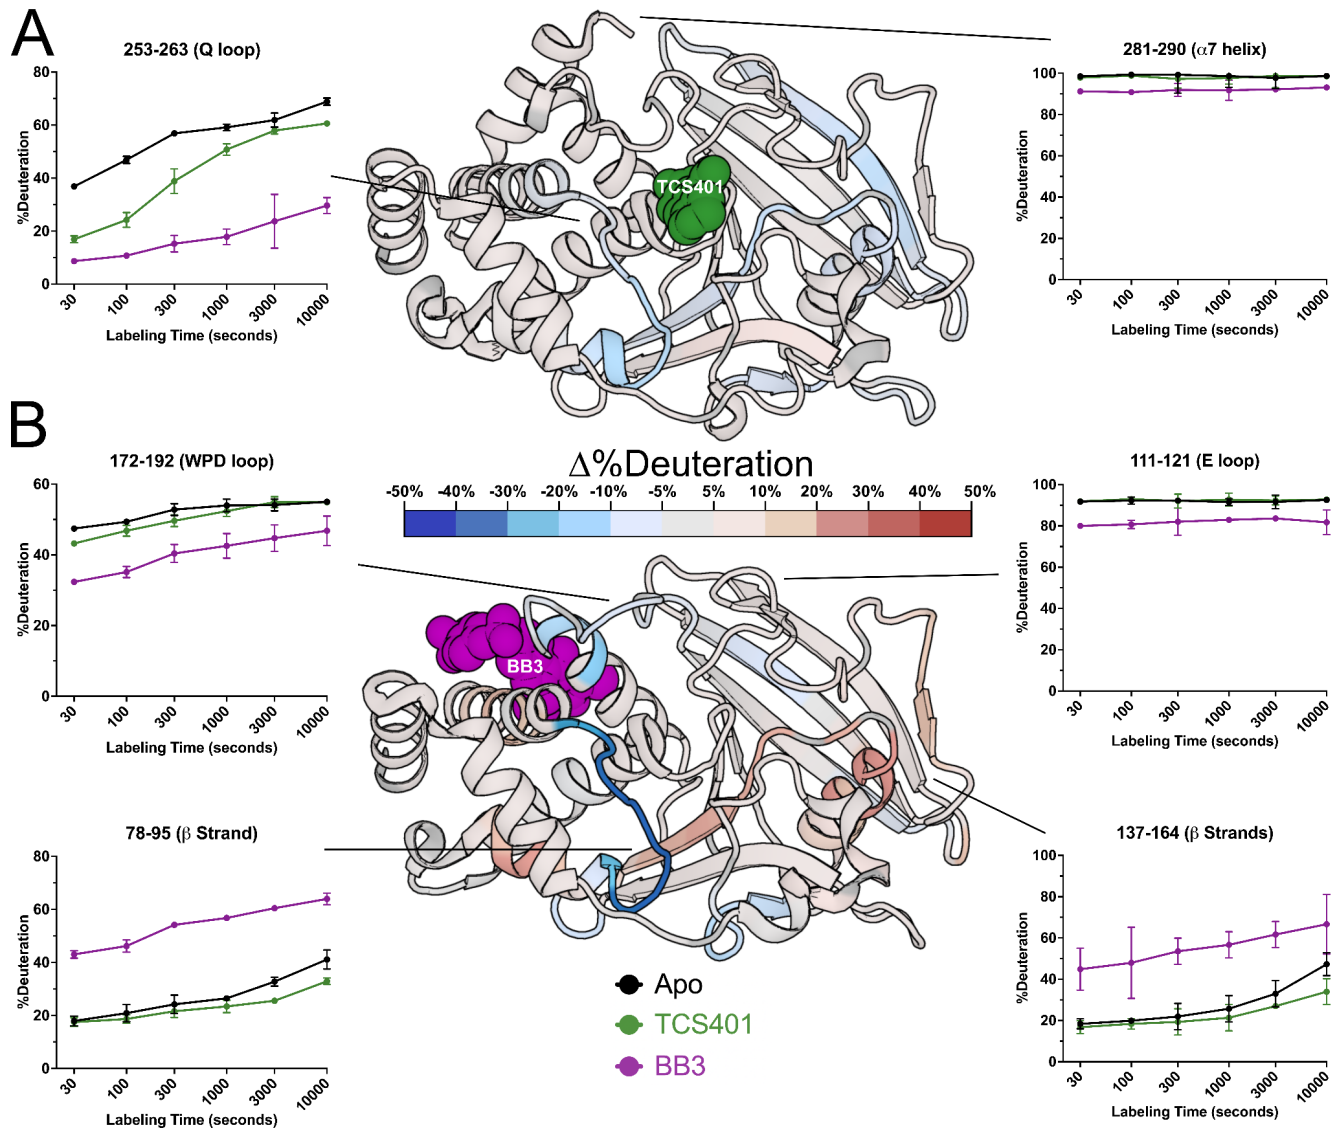

**Figure S3: Effects of active-site inhibitor (TCS401) and allosteric-site inhibitor (BB3) after extended labeling time.**

Same as Fig. 5 but with coloring of residues at 10,000 seconds of labeling time.

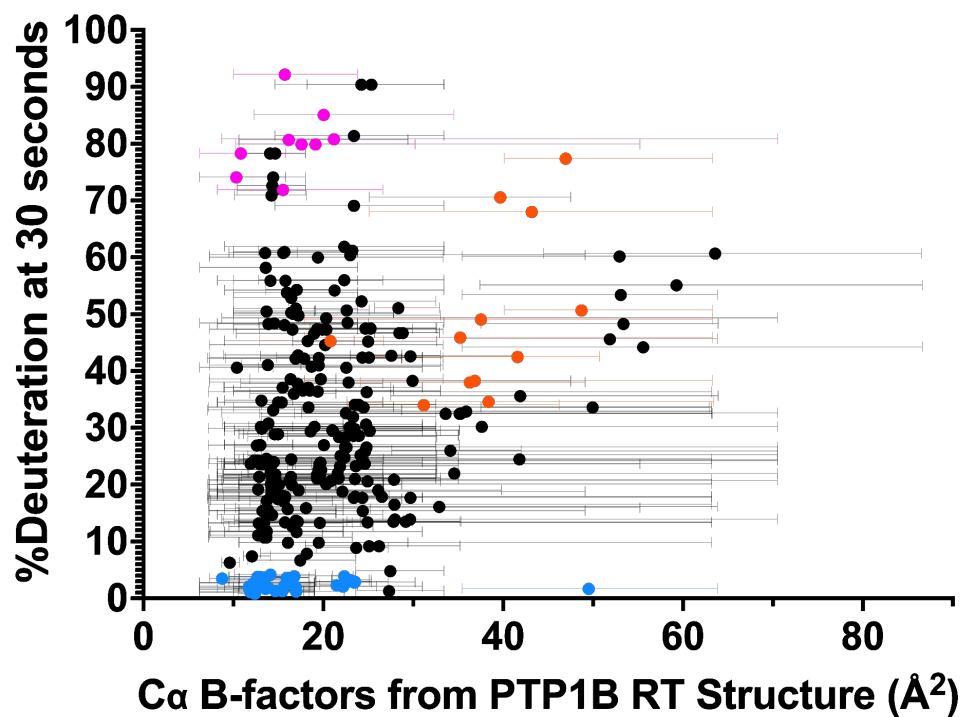

**Figure S4: Room-temperature B-factors correlated with HDX-MS deuteration levels.**

Same as **Fig. 3B**, but using C $\alpha$  B-factors from a representative room-temperature crystal structure of PTP1B (PDB ID 6B8X). Peptides colored blue, magenta, and orange correspond to the same colored peptides in **Fig. 3B-E**. B-factors are occupancy-weighted for residues with alternate conformations.

**Data S1: Fractional deuterium uptake for all three conditions.**

Spreadsheet containing HDX and pseudo-ensemble data.

Tab 1: Peptide raw centroids for all three protein conditions across all time points.

Tab 2: Quantitative HDX data for apo PTP1B at 30 seconds of labeling time.

Tab 3: C $\alpha$  RMSFs from pseudo-ensemble of PTP1B structures.
